# Supplementary material for: Correct Patterning of the Primitive Streak Requires the Anterior Visceral Endoderm
Source: PubMed Central journal article supplement (PMC3060820; doi:10.1371/journal.pone.0017620), 2011-03-18
Supplement: pone.0017620.s004.pdf [file pone.0017620.s004.pdf]

| <b>Hexd × <math>\beta</math>-actin Cre</b> |       | <b>Genotype</b>     |           |
|--------------------------------------------|-------|---------------------|-----------|
| Stage (dpc)                                | Total | Hexd <sup>Act</sup> | Control   |
| 5.5                                        | 20    | 6 (30%)             | 14 (70%)  |
| 6.5                                        | 180   | 40 (22%)            | 140 (78%) |
| 7.5                                        | 41    | 15 (37%)            | 26 (63%)  |
| 9.5                                        | 81    | 17 (21%)            | 64 (79%)  |
| 11.5                                       | 41    | 7 (17%)             | 34 (83%)  |
| Weaning                                    | 156   | 18 (11%)            | 138 (89%) |
