# Supplementary material for: Correct Patterning of the Primitive Streak Requires the Anterior Visceral Endoderm
Source: PubMed Central journal article supplement (PMC3060820; doi:10.1371/journal.pone.0017620), 2011-03-18
Supplement: pone.0017620.s005.pdf [file pone.0017620.s005.pdf]

| <b>Hexd<sup>Act</sup> × +/+</b> |       | <b>Genotype</b>     |          |
|---------------------------------|-------|---------------------|----------|
| Stage (dpc)                     | Total | Hexd <sup>Act</sup> | Control  |
| Weaning                         | 95    | 33 (35%)            | 62 (65%) |
