# Supplementary material for: Correct Patterning of the Primitive Streak Requires the Anterior Visceral Endoderm
Source: PubMed Central journal article supplement (PMC3060820; doi:10.1371/journal.pone.0017620), 2011-03-18
Supplement: pone.0017620.s006.pdf [file pone.0017620.s006.pdf]

---

**Hexd<sup>Act/+</sup>**

| Stage<br>(dpc) | Total | Forebrain defect | Normal   |
|----------------|-------|------------------|----------|
| 8.5            | 20    | 5 (25%)          | 15 (75%) |
| 9.5            | 9     | 3 (33%)          | 6 (66%)  |

---
